# Supplementary material
Source: publisher figshare collection journal article supplement (https://tandf.figshare.com/ndownloader/files/37565065)
Supplement: Supplementary file 1 [file 37565065]

**Appendix 3.** Biogeographic range of the species included in the phylogenetic analysis. Abbreviations: AS, Asia; BGR, biogeographic range; EU, Europe; NAM, North America. References indicate source of morphological and biogeographic information. * denotes specimen added to the matrix of Kimura (2013). New species is bolded for ease of identification.

| Genus | Species | BGR | References |
| --- | --- | --- | --- |
| *"Macrognathomys"* | Bartlett Mountain LF | NAM | Kimura 2011, 2013 |
| *"Macrognathomys"* | *gemmacolis* | NAM | Green 1977; Kimura 2011, 2013 |
| *"Schaubeumys"* | *grangeri* | NAM | Green 1977; Kimura 2013 |
| *"Schaubeumys"* | *sabrae* | NAM | Green 1977; Kimura 2013; Specimens |
| *Allosminthus* | *ernos* | AS | Daxner-Höck et al. 2014; Kimura 2013; Li et al. 2017; Wang 1985 |
| *Bohlinosminthus* | *parvulus** | AS | Daxner-Höck et al. 2014 |
| *Heosminthus* | *borrae** | AS | Daxner-Höck et al. 2014 |
| *Heosminthus* | *chimidae** | AS | Daxner-Höck et al. 2014 |
| ***Heosminthus*** | ***teredens**** | NAM | This paper |
| *Heosminthus* | *nomogenesis** | AS | Li et al. 2017 |
| *Heosminthus* | *primiveris* | AS | Daxner-Höck et al. 2014; Kimura 2013; Wang 1985; Wessels et al. 2020 |
| *Heterosminthus* | *erbajevae** | AS | Kimura 2010 |
| *Heterosminthus* | *firmus** | AS | Daxner-Höck et al. 2014, Zazhigin and Lopatin 2000 |
| *Litodonomys* | *lajeensis** | AS | Daxner-Höck et al. 2014 |
| *Litodonomys* | *minimus** | AS | Kimura 2010 |
| *Megasminthus* | *gladiofex* | NAM | Green 1977; Kimura 2013 |
| *Megasminthus* | *tiheni* | NAM | Green 1977; Kimura 2013 |
| *Omoiosicista* | *fui** | AS | Kimura 2010 |
| *Onjosminthus* | *baindi** | AS | Daxner-Höck et al. 2014 |
| *Parasminthus* | *debruijni** | AS | Daxner-Höck et al. 2014; Lopatin 1999 |
| *Plesiosminthus* | *admyarion* | EU | Comte 2000; Kimura 2013 |
| *Plesiosminthus* | *asiaticus* | AS | Daxner-Höck and Wu 2003; Kimura 2013 |
| *Plesiosminthus* | *barsboldi* | AS | Daxner-Höck and Wu 2003; Daxner-Höck et al. 2014; Kimura 2010, 2013 |
| *Plesiosminthus* | *clivosus* | NAM | Kimura 2013; Wilson 1960; Specimens |
| *Plesiosminthus* | *conjuctus* | EU | Kimura 2013; Ziegler 1994 |
| *Plesiosminthus* | *meridionalis* | EU | Comte 2000; Kimura 2013 |
| *Plesiosminthus* | *moralesi* | EU | Alvarez et al. 1996; Kimura 2013 |
| *Plesiosminthus* | *myarion* | EU | Engesser 1987; Hugueney and Vianey-Lyaud 1980; Kimura 2013 |
| *Plesiosminthus* | *olzi** | AS | Daxner-Höck et al. 2014 |
| *Plesiosminthus* | *schaubi* | EU | Engesser 1987; Freudenthal and Martín-Suárez 2017; Hugueney and Vianey-Lyaud 1980; Kimura 2013 |
| *Plesiosminthus* | *vegrandis* | AS | Kimura 2010, 2013 |
| *Plesiosminthus* | *winistoerferi* | EU | Engesser 1987; Kimura 2013 |
| *Shamosminthus* | *sodovis** | AS | Daxner-Höck 2001; Daxner-Höck et al. 2014 |
| *Sicista* | *bagajevi* | AS | Kimura 2011, 2013 |
| *Sicista* | *betulina* | AS/EU | Cserkész et al. 2019; Kimura 2011; Lebedev et al. 2019 |
| *Sicista* | *bilikeensis* | AS | Kimura 2011, 2013 |
| *Sicista* | *concolor* | AS | Kimura 2011, 2013 |
| *Sicista* | *ertemteensis* | AS | Kimura 2011, 2013 |
| *Sicista* | *praeloriger* | EU | Kimura 2011; Lebedev et al. 2019 |
| *Sicista* | *primus* | AS | Kimura 2011, 2013 |
| *Sicista* | *subtilis* | AS | Kimura 2011, 2013 |
| *Sicista* | *wangi* | AS | Kimura 2011, 2013 |
| *Sinosminthus* | *inapertus** | AS | Wang 1985 |

References cited only in this appendix:

**Daxner-Höck G., & Wu W. Y.** 2003. *Plesiosminthus* (Zapodidae, Mammalia) from China and Mongolia: Migrations of Europe. *Deinsea*, **10**, 127–151.

**Lebedev V. S., Rusin, M. Y., Zemlemerova, E. D., Matrosova, V. A., Bannikova, A. A., Kovalskaya, Y. M., & Tesakov, A. S.** 2019. Phylogeny and evolutionary history of birch mice *Sicista* Griffith, 1827 (Sminthidae, Rodentia): implications from a multigene study. *Journal of Zoological Systematics and Evolutionary Research*, **57**, 695–709.

**Lopatin, A. V.** 1999. New Early Miocene Zapodidae (Rodentia, Mammalia) from the Aral Formation of the Altynshokysu Locality (North Aral Region). *Paleontological Journal*, **33**, 429–438 (in Russian in Paleontologicheskii Zhurnal, 1999, 93–102).
